# Supplementary material for: Lactate induces PD-L1 in HRASG12V-positive oropharyngeal squamous cell carcinoma
Source: PubMed Central journal article supplement (PMC7197448; doi:10.18632/oncotarget.27348), 2020-04-28
Supplement: oncotarget-11-1493-s001.pdf [file oncotarget-11-1493-s001.pdf]

## Lactate induces PD-L1 in HRAS<sup>G12V</sup>-positive oropharyngeal squamous cell carcinoma

### SUPPLEMENTARY MATERIALS

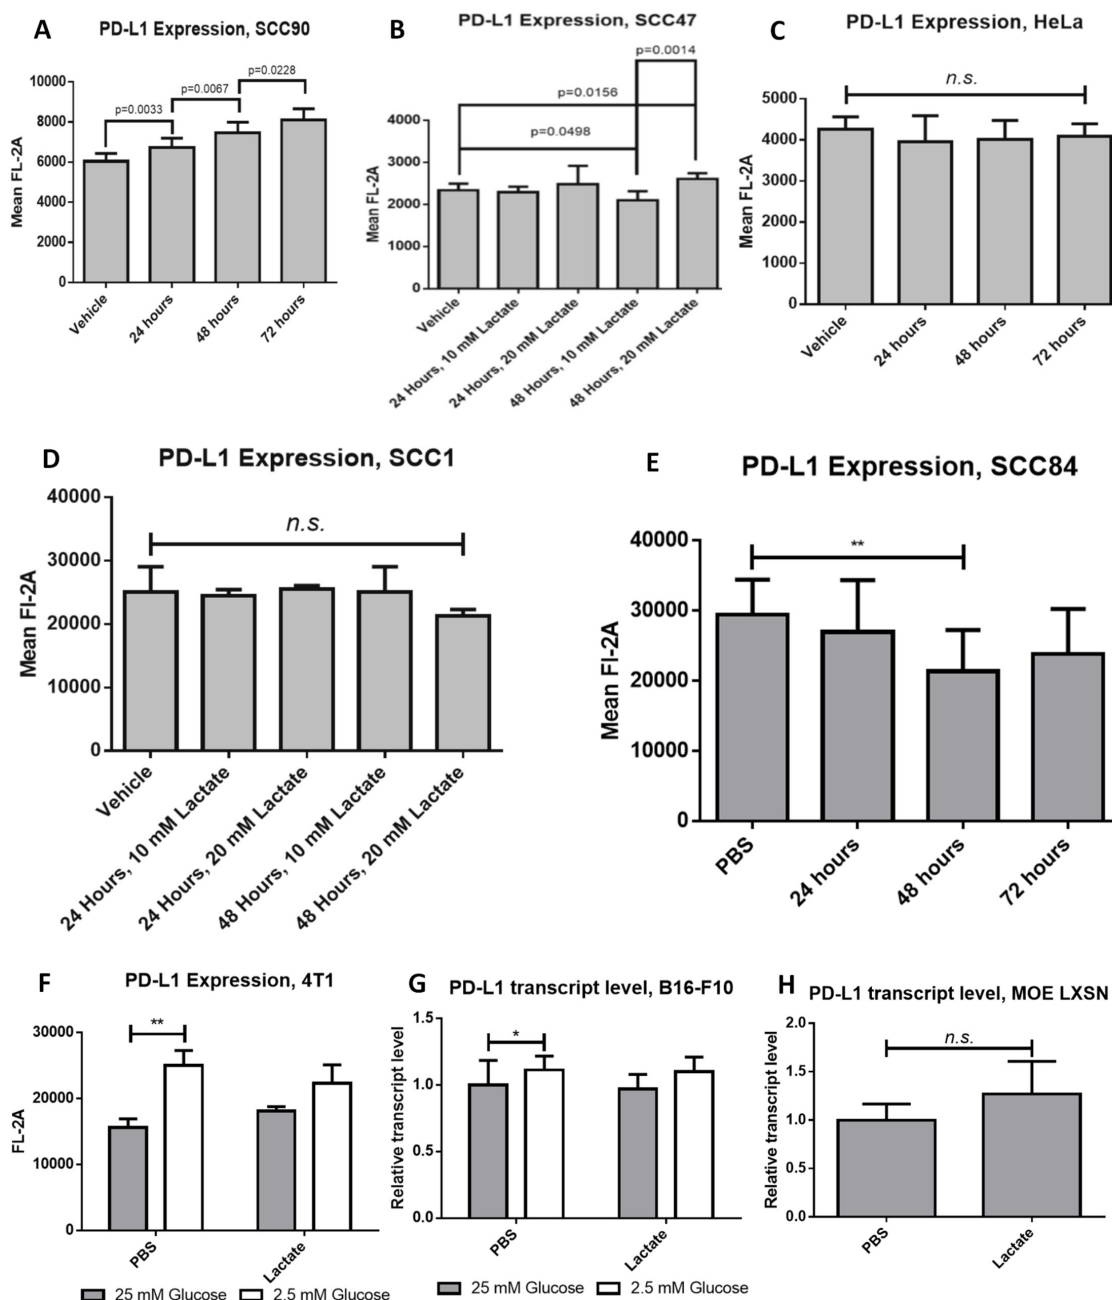

**Supplementary Figure 1: Lactate treatment does not increase PD-L1 expression in all cancer lines.** (A) Flow cytometry data of UPCI:SCC90 (HPV16-positive OPSCC) cells incubated with 10 mM sodium lactate for 24, 48, or 72 hours. (B) Flow cytometry analysis of UM-SCC47 (HPV16-positive OPSCC) cells treated with either vehicle or lactate as indicated. (C) Flow cytometry analysis of HeLa (HPV18-positive cervical cancer) cells treated with either vehicle or lactate as indicated. (D) Flow cytometry analysis of UM-SCC1 (HPV-negative OPSCC) cells treated with either vehicle or lactate. (E) Flow cytometry analysis of UM-SCC84 (HPV-negative OPSCC) cells treated with either vehicle or lactate. (F) Flow cytometry analysis of 4T1 mammary cancer cells treated with either vehicle or lactate in media containing either 25 mM or 2.5 mM glucose. (G) RT-qPCR analysis of B16-F10 melanoma cells treated with either PBS or 10 mM lactate in media containing either 25 mM or 2.5 mM glucose. (H) RT-qPCR analysis of MOE LXSN cells treated with either PBS or 10 mM lactate. \*\* $p < 0.01$ .
